# Supplementary material
Source: PubMed Central journal article supplement (PMC3811456)
Supplement: AAC.00565-13_zac999102174so1.pdf [file AAC.00565-13_zac999102174so1.pdf]

SUPPLEMENTARY TABLE S1 Selected laboratory values: baseline and changes during treatment

|                                             | Patients without cirrhosis |                    |                     |                    |                    |                    | Patients with cirrhosis   |                     |
|---------------------------------------------|----------------------------|--------------------|---------------------|--------------------|--------------------|--------------------|---------------------------|---------------------|
|                                             | Placebo (n=14)             | 100 mg (n=9)       | 200 mg (n=9)        | 400 mg (n=9)       | 800 mg (n=9)       | 1200 mg (n=10)     | 400 mg (n=8) <sup>a</sup> | 600 mg (n=5)        |
| <b>ALT (U/L)</b>                            |                            |                    |                     |                    |                    |                    |                           |                     |
| Baseline, mean±SD                           | 79±60                      | 81±35              | 68±32               | 99±72              | 101±52             | 83±47              | 147±53                    | 110±67              |
| Change, median (range)                      | 12 (-6 to 50)              | -18 (-93 to 7)     | -11 (-69 to 4)      | -43 (-67 to -8)    | -45 (-119 to 48)   | -37 (-121 to 11)   | -62 (-108 to 7)           | -33 (-80 to 8)      |
| <b>AST (U/L)</b>                            |                            |                    |                     |                    |                    |                    |                           |                     |
| Baseline, mean±SD                           | 59±27                      | 59±23              | 46±21               | 78±64              | 61±24              | 47±15              | 117±46                    | 94±21               |
| Change, median (range)                      | -3 (-29 to 60)             | -14 (-78 to -4)    | -15 (-69 to 9)      | -33 (-100 to -5)   | -40 (-64 to 47)    | -13 (-52 to 17)    | -60 (-116 to 2)           | -48 (-104 to 5)     |
| <b>White blood cells (10<sup>9</sup>/L)</b> |                            |                    |                     |                    |                    |                    |                           |                     |
| Baseline, mean±SD                           | 6.1±1.9                    | 6.4±1.5            | 5.6±1.7             | 6.2±1.3            | 6.2±1.4            | 6.6±1.7            | 4.9±0.9                   | 5.0±1.3             |
| Change, median (range)                      | 0.1 (-2.8 to 1.3)          | -0.2 (-1.1 to 1.2) | 0.4 (-1.3 to 1.9)   | 0.4 (0.0 to 2.3)   | 0.3 (-0.3 to 1.2)  | 0.1 (-1.6 to 1.9)  | 0.0 (-1.2 to 0.4)         | -0.6 (-1.1 to -0.3) |
| <b>Platelet count (10<sup>9</sup>/L)</b>    |                            |                    |                     |                    |                    |                    |                           |                     |
| Baseline, mean±SD                           | 186±25                     | 202±55             | 193±35              | 220±70             | 192±30             | 205±43             | 118±19                    | 116±23              |
| Change, median (range)                      | 3 (-17 to 28)              | 9 (-40 to 27)      | 8 (-10 to 27)       | 10 (-80 to 21)     | 2 (-27 to 15)      | 11 (-4 to 21)      | 4 (-9 to 11)              | -12 (-16 to -8)     |
| <b>Hemoglobin (g/dL)</b>                    |                            |                    |                     |                    |                    |                    |                           |                     |
| Baseline, mean±SD                           | 14.8±1.2                   | 15.1±1.1           | 15.0±1.1            | 14.3±2.1           | 15.6±0.7           | 15.4±0.5           | 14.9±2.0                  | 13.7±1.2            |
| Change, median (range)                      | -0.2 (-1.7 to 1.0)         | 0.0 (-0.8 to 0.6)  | -0.8 (-1.7 to -0.1) | -0.3 (-1.1 to 0.0) | -0.6 (-1.3 to 0.5) | -0.6 (-1.5 to 0.3) | -0.6 (-1.8 to 0.9)        | -1.6 (-1.9 to -0.6) |
| <b>Creatinine (mg/dL)</b>                   |                            |                    |                     |                    |                    |                    |                           |                     |
| Baseline, mean±SD                           | 0.8±0.1                    | 0.7±0.1            | 0.8±0.2             | 0.9±0.2            | 0.8±0.1            | 0.8±0.1            | 0.7±0.3                   | 0.9±0.2             |
| Change, median (range)                      | -0.1 (-0.3 to 0.1)         | 0.1 (-0.2 to 0.4)  | 0.0 (-0.1 to 0.2)   | -0.1 (-0.1 to 0.1) | 0.0 (-0.2 to 0.1)  | 0.0 (-0.2 to 0.1)  | -0.1 (-0.2 to 0.1)        | -0.1 (-0.2 to 0.0)  |

<sup>a</sup> Includes one treatment-naïve patient.
